# Supplementary material
Source: PubMed Central journal article supplement (PMC384795)
Supplement: pnas_101_13_4614__3.pdf [file pnas_101_13_4614__3.pdf]

1 MKK P V F F L L T M I I C S Y I S F A C A N I S D Y K V M T W N L Q G S S A S S. typhi  
1 MKK I I C L F L S F - - - N L A F A - - N L E N F N V G T W N L Q G S S A A C. jejuni  
1 MKK L L F L L M I L - - - P G I S F A - - D L S D F K V A T W N L Q G S N A P E. coli

41 T E S K W N V N V R Q L L S G T A G V D I L M V Q E A G A V P T S A V P T G R H S. typhi  
35 T E S K W S V S V R Q L V S G A N P L D I L M I Q E A G T L P R T A T P T G R H C. jejuni  
36 T E N K W N T H V R Q L V T G S G A V D I L M V Q E A G A V P A S A T L T E R E E. coli

81 I Q P F G V G I P I D E Y T W N L G T T S R Q D I R Y I Y H S A I D V G A R R V S. typhi  
75 V Q Q - - G G T P I D E Y E W N L G T L S R P D R V F I Y Y S R V D V G A N R V C. jejuni  
76 F S T - - P G I P M N E Y I W N T G T N S R P Q E L F I Y F S R V D A F A N R V E. coli

121 N L A I V S R Q R A D N V Y V L R P T T V A S R P V I G I G L G N D V F L T A H S. typhi  
113 N L A I V S R M Q A E E V I V L P P P T T V S R P I I G I R N G N D A F F N I H C. jejuni  
114 N L A I V S N R R A D E V I V L P P P T V V S R P I I G I R I G N D V F F S T H E. coli

161 A L A S G G P D A A A I V R V T I N F F - - R Q P Q M R H L S W F L A G D F N S. typhi  
153 A L A N G G T D V G A I I T A V D A H F A N M P Q - - - - V N W M I A G D F N C. jejuni  
154 A L A N R G V D S G A I V N S V F E F F N R Q T D P I R Q A A N W M I A G D F N E. coli

198 R S P D R L E N D L M T E H L E R V V A V L A P T E P T Q I G G G I L D Y G V I S. typhi  
188 R D P S T I T S T V D R E - L A N R I R V V F P T S A T Q A S G G T L D Y A I T C. jejuni  
194 R S P A T L F S T L E P G - I R N H V N I I A P P D P T Q A S G G V L D Y A V V E. coli

238 V D - - - R A P Y S Q R V - - - - - E A L R N P Q L A S D H Y P V A F L A - S. typhi  
227 G N S N R Q Q T Y T P P L L A A I L M L A S L R S - H I V S D H F P V N F R - - C. jejuni  
233 G N S V - - - S F V L P L L R A S L L F G L L R G - Q I A S D H F P V G F I P G E. coli

267 R S C S. typhi  
264 - - - K F C. jejuni  
269 R G A R R E. coli
