# Supplementary material
Source: PubMed Central journal article supplement (PMC384795)
Supplement: pnas_101_13_4614__7.pdf [file pnas_101_13_4614__7.pdf]

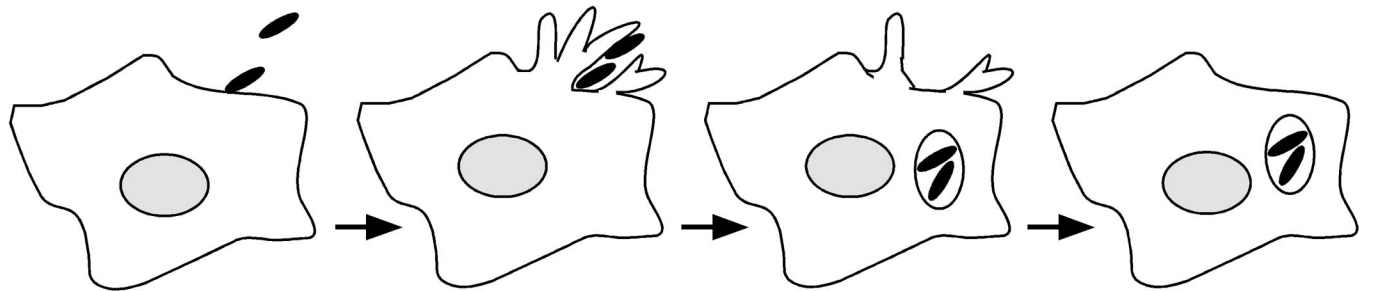

I. *Salmonella* internalization

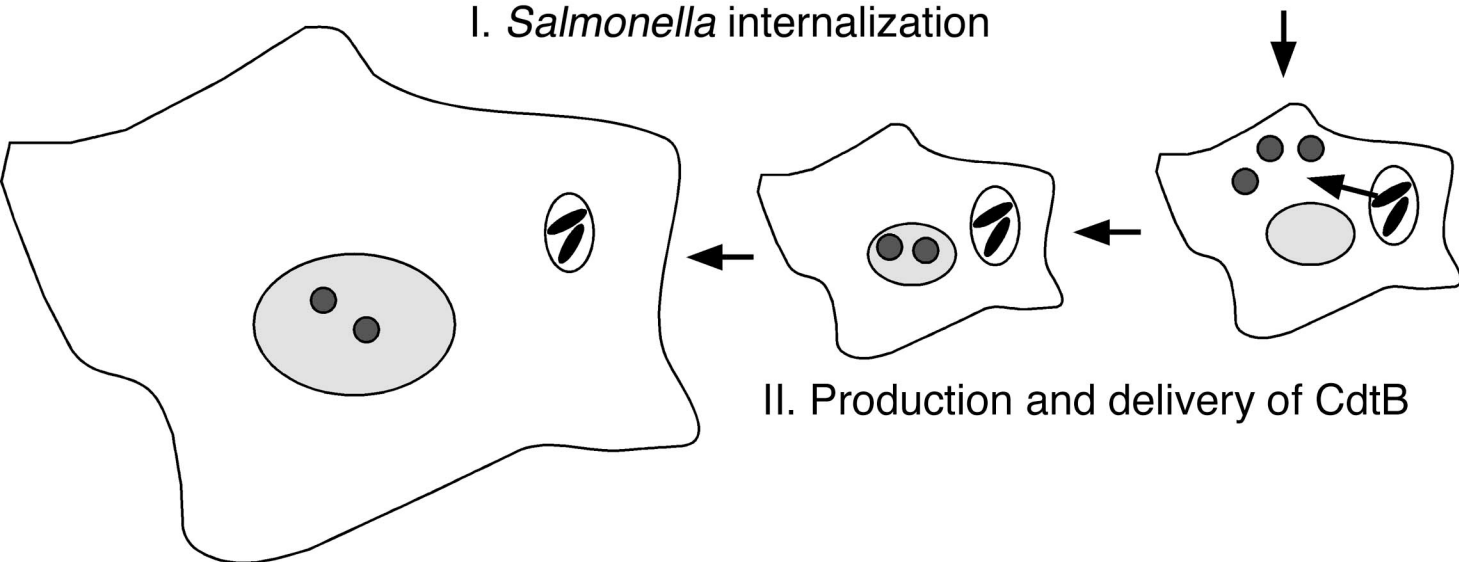

II. Production and delivery of CdtB

III. DNA damage and cell cycle arrest
